# Supplementary material
Source: Springer Nature journal article supplement (https://www.springermedizin.de/resource/supplementary/12990_2008_202_MOESM6_ESM.pdf/9612776)

*Trpa1*<sup>+/+</sup>

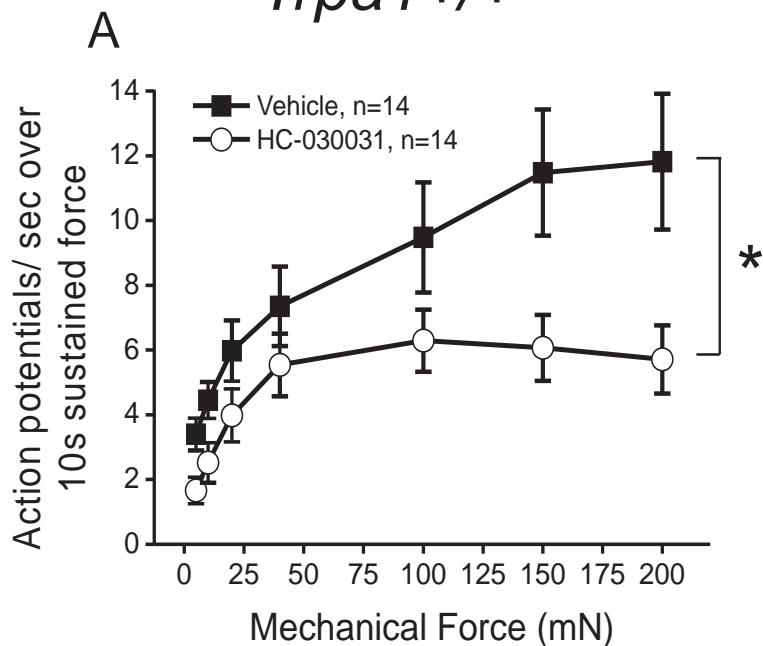

*Trpa1*<sup>-/-</sup>

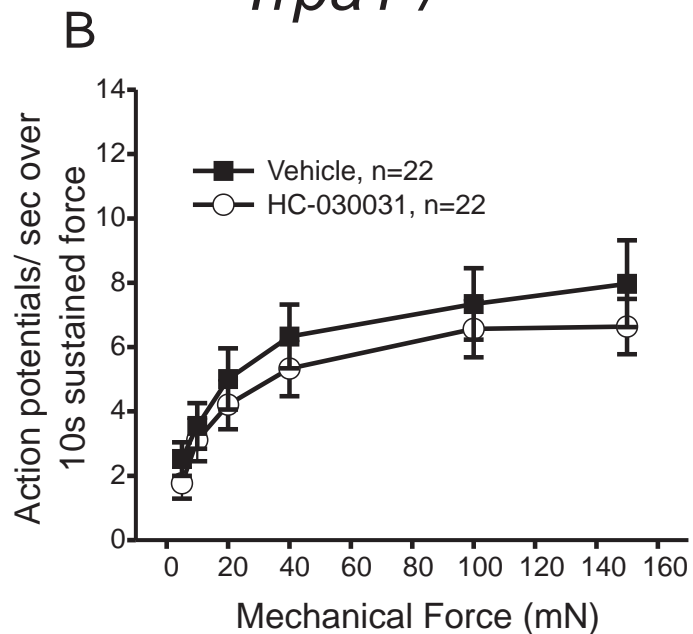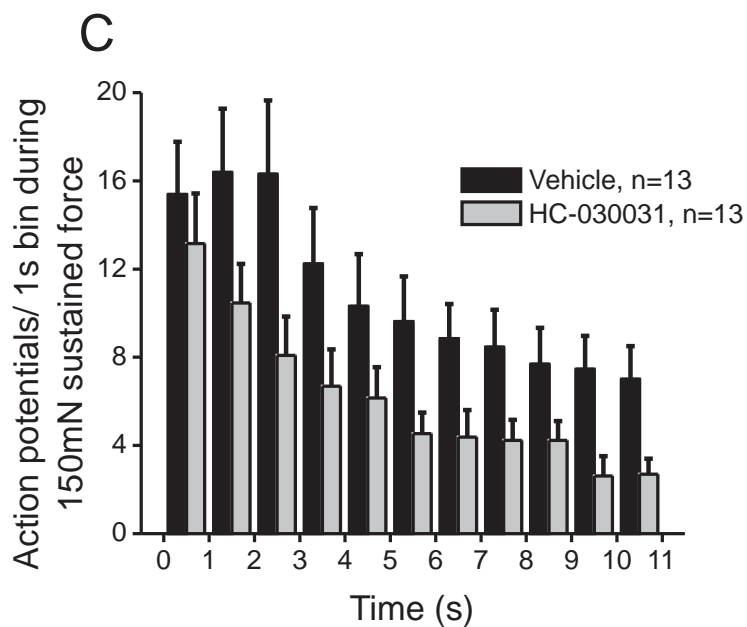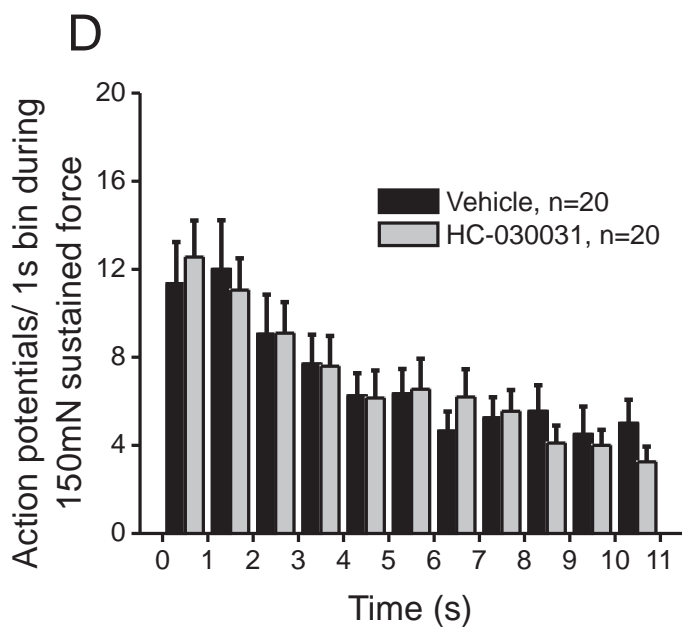

Supplement: MOESM6 [file 9612776]
